# Supplementary material for: Impact of iron oxide nanoparticles on a lead-polluted water–soil–plant system under alternating periods of water stress
Source: Royal Society of Chemistry journal article supplement (doi:10.1039/d2va00283c), 2023-01-01
Supplement: d2va00283c1.pdf [file d2va00283c1.pdf]

## Supporting Information

### **Impact of iron oxide nanoparticles on a lead polluted water-soil-plant system under alternating periods of water stress**

Léa Mounier<sup>a,b</sup>, Mathieu Pédrot<sup>b</sup>, Martine Bouhnik-Le-Coz<sup>b</sup>, Francisco Cabello Hurtado<sup>a\*</sup>

<sup>a</sup>Univ Rennes 1, CNRS, ECOBIO, UMR 6553, Av. General Leclerc, F-35042 Rennes Cedex, France.

<sup>b</sup>Univ Rennes 1, CNRS, Géosciences Rennes, UMR 6118, Av. General Leclerc, F-35042 Rennes Cedex, France.

\* Corresponding author. Phone: +33 2 23235022. Email: [francisco.cabello-hurtado@univ-rennes1.fr](mailto:francisco.cabello-hurtado@univ-rennes1.fr)

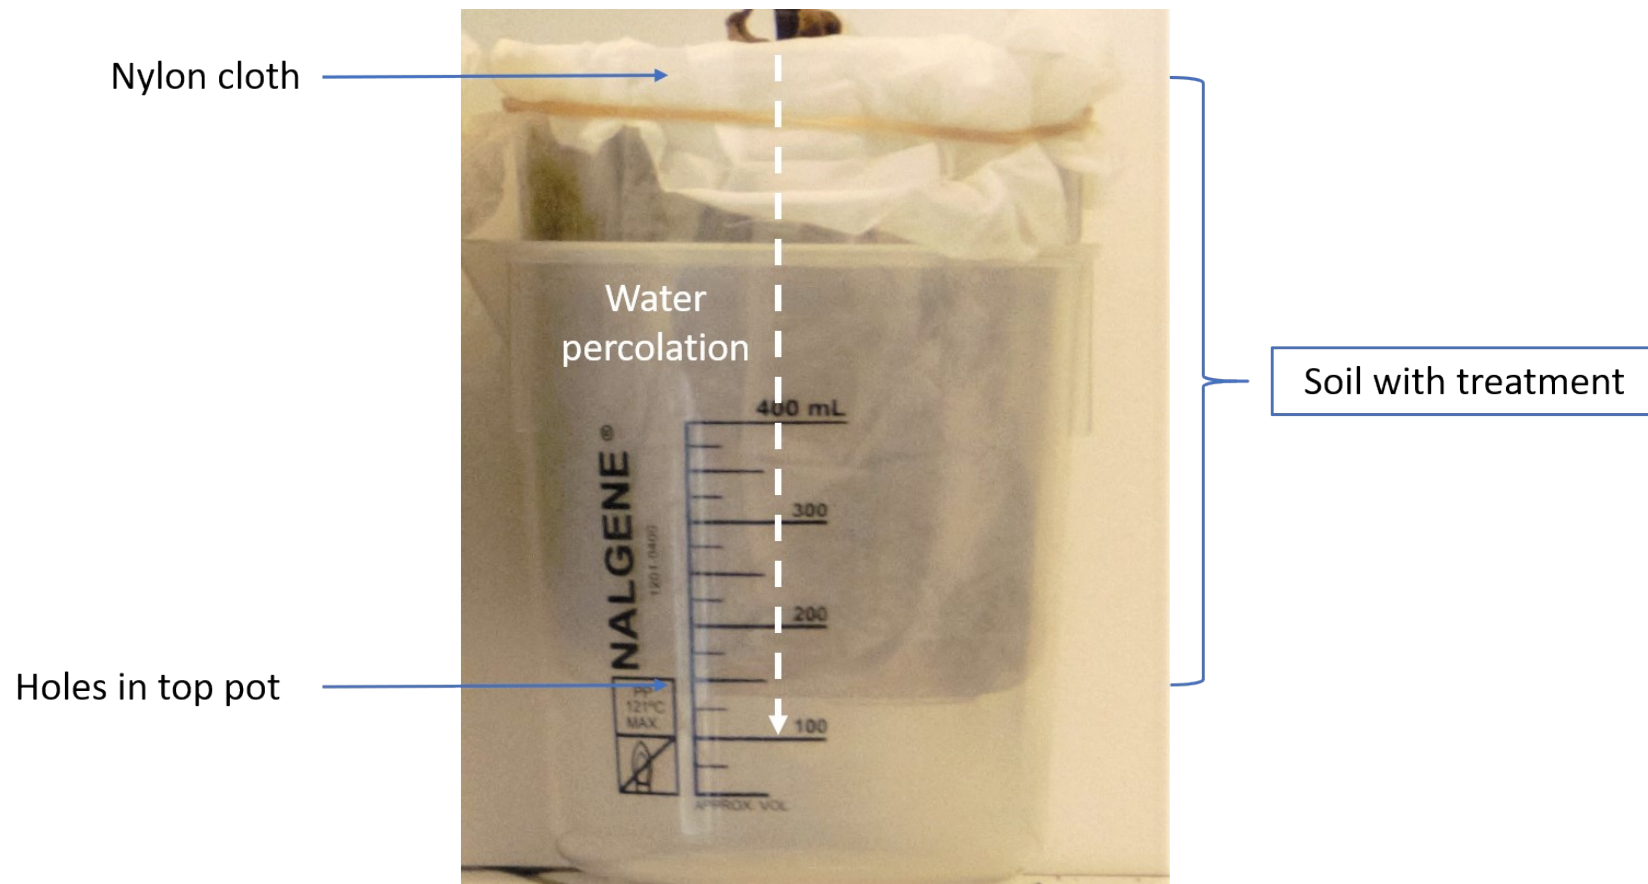

**Fig. S1** Experimental set-up of 400 mL polypropylene beaker (Nalgene)

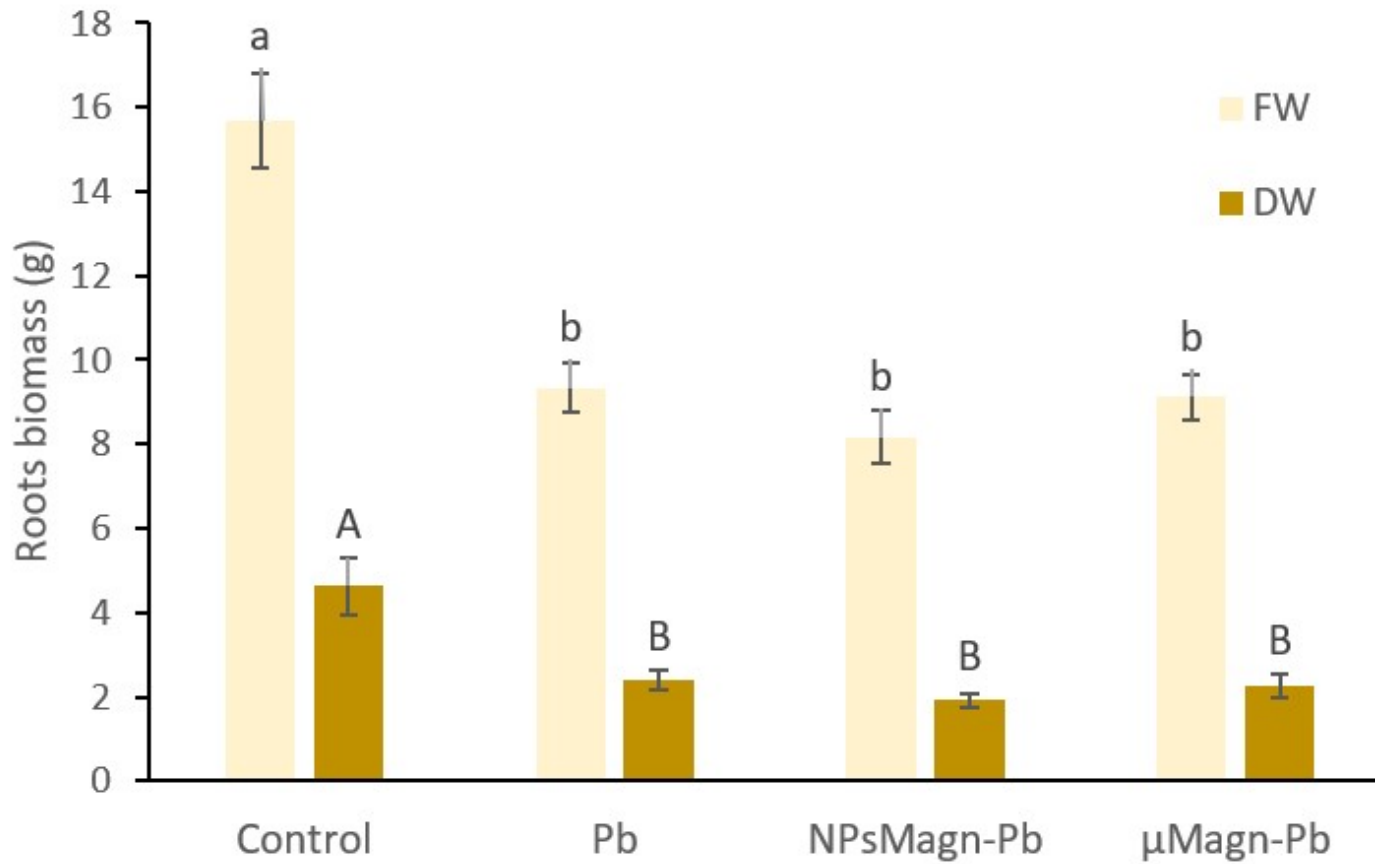

**Fig. S2** Fresh weight (FW) and Dry weight (DW) (g) of roots of sunflower plants measured after 90 days of growth on control soil or containing Pb, NPsMagn-Pb or μMagn-Pb. Data represent the mean ± SEM (n= 6). Different letters above indicates significant difference ( $p < 0.05$ ).

**Table S1** Soil characterization. The analyses were performed in the SARM, Analytical laboratory (Vandoeuvre-lès-Nancy, France).

|                 |                 |                            |                           |                            |                                       |                 |                  |                            |                                        |                                        |                 |
|-----------------|-----------------|----------------------------|---------------------------|----------------------------|---------------------------------------|-----------------|------------------|----------------------------|----------------------------------------|----------------------------------------|-----------------|
| <b>As (ppm)</b> | <b>Ba (ppm)</b> | <b>Be (ppm)</b>            | <b>Bi (ppm)</b>           | <b>Cd (ppm)</b>            | <b>Co (ppm)</b>                       | <b>Cr (ppm)</b> | <b>Cs (ppm)</b>  | <b>Cu (ppm)</b>            | <b>Ga (ppm)</b>                        | <b>Ge (ppm)</b>                        | <b>Hf (ppm)</b> |
| 9.12            | 357             | 1.75                       | 0.38                      | 0.31                       | 15.5                                  | 79.8            | 3.07             | 32.9                       | 15.1                                   | 1.25                                   | 5.28            |
| <b>In (ppm)</b> | <b>Mo (ppm)</b> | <b>Nb (ppm)</b>            | <b>Ni (ppm)</b>           | <b>Pb (ppm)</b>            | <b>Rb (ppm)</b>                       | <b>Sb (ppm)</b> | <b>Sc (ppm)</b>  | <b>Sn (ppm)</b>            | <b>Sr (ppm)</b>                        | <b>Ta (ppm)</b>                        | <b>Th (ppm)</b> |
| 0.06            | 0.69            | 8.45                       | 35.2                      | 53.8                       | 70.3                                  | 1.70            | 12.50            | 4.17                       | 44.6                                   | 0.78                                   | 6.19            |
| <b>U (ppm)</b>  | <b>V (ppm)</b>  | <b>W (ppm)</b>             | <b>Y (ppm)</b>            | <b>Zn (ppm)</b>            | <b>Zr (ppm)</b>                       | <b>La (ppm)</b> | <b>Ce (ppm)</b>  | <b>Pr (ppm)</b>            | <b>Nd (ppm)</b>                        | <b>Sm (ppm)</b>                        | <b>Eu (ppm)</b> |
| 2.12            | 90.5            | 1.84                       | 23.5                      | 144                        | 200                                   | 23.1            | 47.4             | 5.83                       | 22.9                                   | 4.71                                   | 1.09            |
| <b>Gd (ppm)</b> | <b>Tb (ppm)</b> | <b>Dy (ppm)</b>            | <b>Ho (ppm)</b>           | <b>Er (ppm)</b>            | <b>Tm (ppm)</b>                       | <b>Yb (ppm)</b> | <b>Lu (ppm)</b>  | <b>SiO<sub>2</sub> (%)</b> | <b>Al<sub>2</sub>O<sub>3</sub> (%)</b> | <b>Fe<sub>2</sub>O<sub>3</sub> (%)</b> | <b>MnO (%)</b>  |
| 4.15            | 0.671           | 4.21                       | 0.886                     | 2.41                       | 0.358                                 | 2.33            | 0.345            | 64.24                      | 11.59                                  | 5.90                                   | 0.076           |
| <b>MgO (%)</b>  | <b>CaO (%)</b>  | <b>Na<sub>2</sub>O (%)</b> | <b>K<sub>2</sub>O (%)</b> | <b>TiO<sub>2</sub> (%)</b> | <b>P<sub>2</sub>O<sub>5</sub> (%)</b> | <b>PF (%)</b>   | <b>Total (%)</b> |                            |                                        |                                        |                 |
| 1.16            | 0.41            | 0.53                       | 1.95                      | 0.81                       | 0.21                                  | 12.88           | 99.75            |                            |                                        |                                        |                 |

**Table S2** Quantum yield measured on the leaves between day 35 and 87 of the experiment. Data represent the mean  $\pm$  SEM (n=6). Different letters indicate significant differences ( $p < 0.05$ ).

|            | Control                       | Pb                            | NPsMagn-Pb                    | $\mu$ Magn                    |
|------------|-------------------------------|-------------------------------|-------------------------------|-------------------------------|
| <b>d35</b> | 0,85 $\pm$ 0,007 <sup>a</sup> | 0,85 $\pm$ 0,003 <sup>a</sup> | 0,85 $\pm$ 0,001 <sup>a</sup> | 0,85 $\pm$ 0,004 <sup>a</sup> |
| <b>d41</b> | 0,84 $\pm$ 0,004 <sup>a</sup> | 0,85 $\pm$ 0,003 <sup>a</sup> | 0,85 $\pm$ 0,004 <sup>a</sup> | 0,85 $\pm$ 0,003 <sup>a</sup> |
| <b>d48</b> | 0,83 $\pm$ 0,003 <sup>a</sup> | 0,83 $\pm$ 0,007 <sup>a</sup> | 0,82 $\pm$ 0,007 <sup>a</sup> | 0,84 $\pm$ 0,006 <sup>a</sup> |
| <b>d63</b> | 0,83 $\pm$ 0,003 <sup>a</sup> |
| <b>d66</b> | 0,83 $\pm$ 0,007 <sup>a</sup> | 0,84 $\pm$ 0,004 <sup>a</sup> | 0,83 $\pm$ 0,006 <sup>a</sup> | 0,84 $\pm$ 0,004 <sup>a</sup> |
| <b>d70</b> | 0,82 $\pm$ 0,008 <sup>a</sup> | 0,81 $\pm$ 0,010 <sup>a</sup> | 0,81 $\pm$ 0,004 <sup>a</sup> | 0,82 $\pm$ 0,009 <sup>a</sup> |
| <b>d77</b> | 0,82 $\pm$ 0,003 <sup>a</sup> | 0,82 $\pm$ 0,006 <sup>a</sup> | 0,82 $\pm$ 0,006 <sup>a</sup> | 0,82 $\pm$ 0,008 <sup>a</sup> |
| <b>d84</b> | 0,82 $\pm$ 0,008 <sup>a</sup> | 0,82 $\pm$ 0,008 <sup>a</sup> | 0,82 $\pm$ 0,006 <sup>a</sup> | 0,83 $\pm$ 0,004 <sup>a</sup> |
| <b>d87</b> | 0,82 $\pm$ 0,003 <sup>a</sup> | 0,83 $\pm$ 0,004 <sup>a</sup> | 0,83 $\pm$ 0,005 <sup>a</sup> | 0,83 $\pm$ 0,003 <sup>a</sup> |

**Materials and methods: Maximum quantum yield of photosynthesis measurement.** Pulse-amplitude modulated (PAM) fluorescence was determined using a FluorPen FP100 on two leaves of each plant (n=6) after a dark adaptation for 30 min to oxidize the PSII reaction centers. Measurements were made at different days of growth (from day 35 to 87).
